# Supplementary material for: Cerebral amyloid-β proteostasis is regulated by the membrane transport protein ABCC1 in mice
Source: JCI journal article supplement (doi:10.1172/jci57867), 2011-09-01
Supplement: sd1 [file 1]

# Supplemental Material

**Title:**

**Cerebral amyloid- $\beta$  proteostasis is highly regulated by the membrane transport protein ABCC1 in mice**

**Authors:**

Markus Krohn, Cathleen Lange, Jacqueline Hofrichter, Katja Scheffler, Jan Stenzel, Johannes Steffen, Toni Schumacher, Thomas Brüning, Anne-Sophie Plath, Franziska Alfen, Anke Schmidt, Felix Winter, Katja Rateitschak, Andreas Wree, Jörg Gsponer, Lary C. Walker & Jens Pahnke

**Supplementary Information – include**

|                                       |       |
|---------------------------------------|-------|
| Supplementary Methods/Equations ..... | 2-8   |
| Supplementary Figures .....           | 9-16  |
| Supplementary Tables .....            | 17-19 |
| Supplementary References .....        | 20    |

## Supplementary Methods/Equations

### Mathematical modeling of A $\beta$ kinetics

We developed a mathematical model to determine whether changes in monomeric A $\beta$  excretion from the brain can lead to the different temporal aggregation profiles that we observed in mouse models. The main assumptions of the model and its structure are developed on the basis of our experimental data and on previously published results and hypotheses related to protein aggregation.

Owing to the multitude of mechanisms involved in the in vivo aggregation of A $\beta$ , some of which almost certainly remain unknown, we did not attempt a detailed mechanistic mathematical representation. Instead we concentrated on distilling the available knowledge into a model that illuminates the underlying dynamics and provides explanations for the experimental observations in ABC transporter-deficient mice. The phenotypic changes in the different transgenic mice that we employed are the result of a complicated interplay between protein aggregation and aggregate removal processes. Nevertheless, our model reveals that these changes can be attributed to a few basic biological mechanisms.

To capture the main mechanisms underlying protein aggregation in Alzheimer's disease, we established a reduced biochemical reaction network that describes monomer secretion and A $\beta$  aggregation. The underlying biochemical processes can be clustered into two interdependent modules:

- i) *Module 1* describes the production of monomeric A $\beta$  and its removal from the brain by cellular processes. Although the latter include processes such as enzymatic degradation and proteasomal degradation, our model focuses on active transport to capture the differences in the transgenic mouse strains.
- ii) *Module 2* describes the aggregation of monomeric A $\beta$  peptides that initially form nuclei and their subsequent growth by addition of monomers.

The two modules of our reaction network interact in two ways (see Figure 3):

- i) *Module 1* and *Module 2* share the same pool of A $\beta$  monomers, and
- ii) insoluble aggregates of *Module 2* (the guanidine-soluble A $\beta$  fraction) impede monomer removal described in *Module 1*.

By using these two modules, we can highlight the main mechanisms governing the temporal behavior of protein deposition in the brain: A $\beta$  monomer abundance over time influenced by the production and removal by cellular machinery (*Module 1*) and the removal of A $\beta$  monomers from the pool by aggregation (*Module 2*).

## Assumptions for the biochemical network representing protein production, removal and aggregation

### Assumptions for *Module 1*:

- i) Our experimental data show constant APP expression by the transgene. We therefore assume constant monomer production in our transgenic model. This assumption has been used previously in Craft *et al.* (1).
- ii) Monomeric A $\beta$  can be removed by ABC transporters, see this paper and (2-4).
- iii) Knockout of A $\beta$ -excreting ABC transporters permanently decreases A $\beta$  removal by active molecular transporters (this paper). Other mechanisms that clear A $\beta$  from the brain, such as enzymatic cleavage and proteasomal degradation, are not affected by the ABC transporter knockouts (Supplementary Figure 4 and Supplementary Table 5).
- iv) Removal of monomeric A $\beta$  by ABC transporters is hampered by A $\beta$  aggregates. Deposition of A $\beta$  has been shown to be inversely correlated with ABCB1 expression in the elderly brain (3, 5). We assume that this negative correlation is the result of a causal relationship. As the immunohistochemical methods used by Vogelgesang *et al.* (3) only reveal insoluble A $\beta$  aggregates; the negative causal relationship was restricted to insoluble A $\beta$ .

### Assumptions for *Module 2*:

- i) The first step in A $\beta$  aggregation is the formation of nuclei consisting of a fixed number of monomers. Nucleation is known to be an important first step in the aggregation of A $\beta$ 42, while the exact nucleus size is still a matter of discussion (6, 7).
- ii) A $\beta$  aggregation occurs by monomer addition to the nuclei. Sequential monomer addition is included in many models of protein aggregation; for a comparison see Bernacki *et al.* (8).
- iii) Aggregation occurs at different rates. To reduce the reaction network's complexity, two groups of aggregates are considered according to our biological data: 'soluble' (i.e. buffer-soluble A $\beta$ ) and 'insoluble' (i.e. guanidine-soluble A $\beta$ ). We assume that all aggregates in one group are formed with the same aggregation constant.
- iv) Breakage of A $\beta$  aggregates is negligible for the reproduction of the experimentally measured temporal aggregation profile. Fibril breakage was considered during the construction of the mathematical model, but parameter value estimation suggested that fibril breakage has no influence.

## Translation of the biochemical reaction network into a mathematical model

The network was translated into a system of algebraic and ordinary differential equations that describe the temporal changes of aggregate concentrations as a function of the aggregation and transport processes.

### Implementation of assumptions in *Module 1*:

- i) Constant monomer production:  
Production of monomeric A $\beta$  is modeled by a constant production term  $p$ .
- ii) Removal of monomeric A $\beta$  by ABC transporters:

In order to reduce the complexity of the model, all transport mechanisms are merged into one term. We define the transport rate  $R_T$  as the product of a constant parameter  $c_T$ , which we call the *clearance capacity*, and the available monomers  $M$ .  $R_T = c_T \cdot M$

- iii) Knockouts of A $\beta$ -excreting ABC transporters permanently decrease A $\beta$  removal by active molecular transporters.

This assumption is not expressed in the equations of the model. Instead it is used to predict the influence of ABC transporter deficiency in the mouse models.

- iv) Larger aggregates impede removal of monomeric A $\beta$ :

To mathematically realize this assumption, we calculate the net inflow  $I_{net}$  into the pool of monomeric A $\beta$  as the difference of its constant production  $p$  and the removal of monomeric A $\beta$  by the ABC transporters. The transport is characterized by its activity  $a_T$ , being the product of the transport rate,  $R_T$ , and a term describing the impeding influence of the insoluble aggregates. This leads to the following equation for the net inflow:

$$I_{net} = p - a_T, \quad I_{net} \geq 0.$$

Parameters are constrained such that  $I_{net}$ ,  $p$  and  $R_T$  are positive. According to the information above,  $a_T$  is given by

$$a_T = R_T \cdot \frac{s_T^{e_T}}{s_T^{e_T} + L^{e_T}},$$

The term  $\frac{s_T^{e_T}}{s_T^{e_T} + L^{e_T}}$  describes the negative influence of insoluble aggregates ( $L$ ) on transporter

activity.  $s_T$  and  $e_T$  are two shape parameters that allow the description of vast possibilities of different interactions. Modeling the negative influence of insoluble A $\beta$  on the transport mechanism in the given way guarantees that

- i) the activity  $a_T$  of the transport mechanism is always larger than zero and smaller than the transport rate  $R_T$ ,
- ii)  $a_T$  decreases with increasing values of  $L$ ,
- iii) we provide a general and simple description of a broad range of possible mechanisms leading to the reduction of monomeric A $\beta$  transport.

Implementation of assumptions in *Module 2*:

- i) The first step in A $\beta$  aggregation is the formation of nuclei consisting of  $n_n$  monomers. The reaction rate for the production of nuclei depends on the nucleation constant  $k_n$  and the monomer concentration  $M$ .

Accordingly, the rate for monomer decrease is:  $-k_n \cdot n_n \cdot M^{n_n}$  while the quantity of nuclei is increased at rate  $k_n \cdot M^{n_n}$ .

- ii) A $\beta$  aggregation occurs by subsequent monomer addition to the nuclei: Each aggregate  $A_j$  of size  $j$  is formed by addition of one monomer to one aggregate of size  $j-1$ .

Two groups of aggregates are being considered according to the buffer solubility: ‘soluble’ and ‘insoluble’. Two different reaction constants are used to describe the differences in the formation of the two groups of aggregates.

The soluble pool of aggregates consists of the monomers, the nuclei and all aggregates up to the size  $n_s$ . The insoluble pool of aggregates contains all aggregates from size  $(n_s+1)$  up to the largest modeled aggregate of size  $n_i$ . Hence,  $n_n$  (nucleus size),  $n_s$  (number of monomers in the largest aggregate in soluble pool), and  $n_i$  (number of monomers in the largest aggregate considered in the model) are the only three integer-valued parameters in the model. Their respective values are discussed in the section on parameter estimation and are listed in Supplementary Table 1.

Rate constants for aggregation are assigned to both the pool of soluble and the pool of insoluble A $\beta$ . These are named  $k_{sol}$  and  $k_{insol}$ , respectively. Depending on the pool an aggregate belongs to, the aggregation rate is computed as  $k_{sol} \cdot A_j \cdot M$  or  $k_{insol} \cdot A_j \cdot M$ . The  $A_j$  denotes the concentration of aggregates of size  $j$ .

### Equations of the model

The net inflow  $I_{net}$  (i.e. export-reduced production of A $\beta$ ) of monomers to the system is calculated by the following equation:

|                                           |                                                                                                       |
|-------------------------------------------|-------------------------------------------------------------------------------------------------------|
| $I_{net} = p - a_T, \quad I_{net} \geq 0$ | <p>Net inflow is equal to the production minus the remaining activity of the transport mechanism.</p> |
|-------------------------------------------|-------------------------------------------------------------------------------------------------------|

According to the formulation of the term describing the impeding influence of the insoluble pool of aggregates, the activity of the transport mechanism decreases if the concentration of insoluble A $\beta$  increases.

The temporal changes in the concentration of monomers, nuclei ( $N$ ) and all other aggregates ( $A_{n_n+1}$  to  $A_{n_i}$ ) are described by the following equations, where subscripts on the aggregates  $A$  indicate the number of monomers comprising them.

|                                                                                                                                                                                                                  |                                                                                                                                                                                                                                                                                                                     |
|------------------------------------------------------------------------------------------------------------------------------------------------------------------------------------------------------------------|---------------------------------------------------------------------------------------------------------------------------------------------------------------------------------------------------------------------------------------------------------------------------------------------------------------------|
| $\begin{aligned} \frac{dM}{dt} = & I_{net} - k_n \cdot n_n \cdot M^{n_n} \\ & - k_{sol} \cdot N \cdot M \\ & - k_{sol} \cdot A_{n_n+1} \cdot M \\ & - k_{sol} \cdot A_{n_n+2} \cdot M \\ & \vdots \end{aligned}$ | <p>Net inflow and free monomer decrease by nucleation.</p> <p>Free monomer decrease by monomer addition to a nucleus.</p> <p>Free monomer decrease by monomer addition to an aggregate of size <math>n_n+1</math>.</p> <p>Free monomer decrease by monomer addition to an aggregate of size <math>n_n+2</math>.</p> |
|------------------------------------------------------------------------------------------------------------------------------------------------------------------------------------------------------------------|---------------------------------------------------------------------------------------------------------------------------------------------------------------------------------------------------------------------------------------------------------------------------------------------------------------------|

|                                                                                                                     |                                                                                                                                                                                                                                                                                      |
|---------------------------------------------------------------------------------------------------------------------|--------------------------------------------------------------------------------------------------------------------------------------------------------------------------------------------------------------------------------------------------------------------------------------|
| $-k_{sol} \cdot A_{n_s-1} \cdot M$ $-k_{insol} \cdot A_{n_s} \cdot M$ $\vdots$ $-k_{insol} \cdot A_{n_i-1} \cdot M$ | <p>Free monomer decrease by monomer addition to an aggregate of size <math>n_s-1</math>.</p> <p>Free monomer decrease by monomer addition to an aggregate of size <math>n_s</math>.</p> <p>Free monomer decrease by monomer addition to an aggregate of size <math>n_i-1</math>.</p> |
| $\frac{dN}{dt} = k_n \cdot M^{n_n} - k_{sol} \cdot N \cdot M$                                                       | <p>Nuclei produced by monomer nucleation minus nuclei converted to larger aggregates by monomer addition.</p>                                                                                                                                                                        |
| $\frac{dA_{n_n+1}}{dt} = k_{sol} \cdot N \cdot M - k_{sol} \cdot A_{n_n+1} \cdot M$                                 | <p>Aggregates of size <math>n_n+1</math> produced by monomer addition to nuclei minus aggregates converted to larger aggregates by monomer addition.</p>                                                                                                                             |
| $\frac{dA_j}{dt} = k_{sol} \cdot A_{j-1} \cdot M - k_{sol} \cdot A_j \cdot M,$ $j = (n_n + 2, \dots, n_s - 1)$      | <p>Aggregates of size <math>j</math> produced by monomer addition to aggregates of size <math>(j-1)</math> minus aggregates of size <math>j</math> converted to larger aggregates by monomer addition.</p>                                                                           |
| $\frac{dA_{n_s}}{dt} = k_{sol} \cdot A_{n_s-1} \cdot M - k_{insol} \cdot A_{n_s} \cdot M$                           | <p>Aggregates of size <math>n_s</math> produced by monomer addition to aggregates of size <math>(n_s-1)</math> minus aggregates converted to larger aggregates by monomer addition.</p>                                                                                              |
| $\frac{dA_j}{dt} = k_{insol} \cdot A_{j-1} \cdot M - k_{insol} \cdot A_j \cdot M,$ $j = n_s + 1, \dots, n_i - 1$    | <p>Aggregates of size <math>j</math> produced by monomer addition to aggregates of size <math>(j-1)</math> minus aggregates of size <math>j</math> converted to larger aggregates by monomer addition.</p>                                                                           |
| $\frac{dA_{n_i}}{dt} = k_{insol} \cdot A_{n_i-1} \cdot M$                                                           | <p>Aggregates of size <math>n_i</math> produced by monomer addition to aggregates of size <math>(n_i-1)</math>.</p>                                                                                                                                                                  |

The model was implemented in Matlab 7.10 (The Mathworks, Inc. Natick, Massachusetts).

### Estimation of parameter values

Our model has ten unknown parameters, three of them integer-valued and seven real-valued. To compare the model simulations with experimental data, we fixed the three integer-valued parameters using the values presented in Supplementary Table 1. This allows for the estimation of real-valued parameters from experimental time series using nonlinear global optimization.  $n_n$  was set to 6, according to the hexamer paranucleus considered by Bernstein *et al.* (7). Being aware of the ongoing discussion about the “true” nucleus size, we also tested our model with  $n_n = 5$  as suggested by Ahmed *et al.* (6), with comparable results (not shown here.) Because our objective is a phenomenological model rather than a mechanistic one, there is no way to assess this parameter to be “right” or “wrong”. The same argument holds for the other two integer parameters,  $n_s$  (number of monomers in the largest aggregate in

soluble pool), and  $n_i$  (number of monomers in the largest aggregate considered in the model), which are not to be interpreted in a mechanistic sense.

The variables of the mathematical model are given in units of aggregate numbers normalized to total protein mass. The ELISA measurements are given in  $ng/mg$  where  $ng$  refers to mass of A $\beta$  and  $mg$  refers to the total protein mass of the soluble and insoluble fraction, respectively. To compare model simulations with experimental data we transformed the variables of the model to new variables such that the new variables have the unit  $ng/mg$ . This was done by the following steps: The mass of an A $\beta$  monomer is  $X = 4$  kDa which can be transformed to  $X = 6.642 \cdot 10^{-12}$  ng. We multiplied each equation by  $X$ . Then we introduced new variables  $M', N', A_j'$  and new parameters which are defined as follows:

|                                               |                                                |
|-----------------------------------------------|------------------------------------------------|
| $M' = X \cdot M$                              | Concentration of monomers in ng/mg             |
| $N' = X \cdot N$                              | Concentration of nuclei in ng/mg               |
| $A_j' = X \cdot A_j, j = n_{n+1}, \dots, n_i$ | Concentration of different aggregates in ng/mg |
| $k_n' = k_n \cdot X^{-n_n+1}$                 | Nucleation constant                            |
| $k_{sol}' = k_{sol} \cdot X^{-1}$             | Aggregation constant for soluble aggregates    |
| $k_{insol}' = k_{insol} \cdot X^{-1}$         | Aggregation constant for insoluble aggregates  |
| $p' = X \cdot p$                              | Production rate of monomeric beta-Amyloid      |
| $s_T' = X \cdot s_T$                          | Shift parameter for transport mechanism        |

The physical interpretation of the new variables is the still the same as for the old variables: each variable value is proportional to the number of the respective aggregate though the new variables have the unit  $ng/mg$ . Then the concentration of monomeric A $\beta$  included in each aggregate was calculated by multiplying the concentration of the aggregate described by the new variables with the number of monomers. In a second step, the concentration of monomers in the pool of soluble A $\beta$  and the concentration of monomers in the pool of insoluble A $\beta$  were computed as the sum of monomer concentrations in all aggregates belonging to the respective pools.

To evaluate the ability of our model to reproduce the experimentally obtained ELISA measurements from APP/PS1xABCC1<sup>-/-</sup> mice, we determined the values of the real-valued parameters and the initial monomer concentration by global optimization. We chose only the soluble A $\beta$  ELISA measurements for optimization. This was done because soluble A $\beta$  is thought to contain the most toxic aggregates, and is therefore the main subject of interest (9). Furthermore, the accumulation of insoluble A $\beta$  is a passive process that depends directly on the concentration of soluble A $\beta$ . The squared difference between the simulation results for soluble A $\beta$  monomers and the ELISA measurements of soluble A $\beta$  in APP/PS1xABCC1<sup>-/-</sup> mice was minimized by global optimization using the PSwarmM Software v1.4 (10). The results of parameter optimization are presented in Supplementary Tables 2 and 3.

### Model simulations and model validation

The numerical solution of the ordinary differential equations with optimized parameters led to temporal concentration profiles for soluble A $\beta$  (buffer-soluble) and for insoluble A $\beta$

(guanidine-soluble), shown in Figure 4A-B in the main text. The simulations of the mathematical model with optimized parameters closely matched the characteristics of in vivo A $\beta$  accumulation in APP/PS1x ABCC1<sup>-/-</sup> mice. Although the values for the seven real-valued parameters were estimated to represent the soluble A $\beta$ 42 concentrations measured by ELISA only, the resulting simulation predicted the temporal aggregation profile for insoluble A $\beta$ 42 concentrations surprisingly well. This suggests that our model captures the main mechanisms underlying the aggregation of A $\beta$ 42 in APP/PS1xABCC1<sup>-/-</sup> mice.

To validate our assumption that a change in monomeric A $\beta$  could result in different temporal aggregation profiles observed in the mouse models with different transporter knockouts, we investigated the model's behavior using the initial parameter set with only one parameter being changed. Assuming that the knockout of the ABC transporters permanently decreases A $\beta$  removal from the brain, we fixed all parameters except the clearance capacity  $c_T$ . Increasing the clearance capacity by only 11% (as compared to APP/PS1xABCC1<sup>-/-</sup> mice) lead to the slower aggregation profile observed in APP/PS1xABCB1<sup>-/-</sup> mice (Figure 4C-D in the main text).

Interestingly, our results are obtained without consideration of fibril breakage. As fibril breakage has been discussed as a factor in the seeding of A $\beta$  deposition (11), we initially included the possibility of fibril breakage in our model. Parameter value estimation resulted in a value of zero for the breakage constant.



## Supplementary Figures

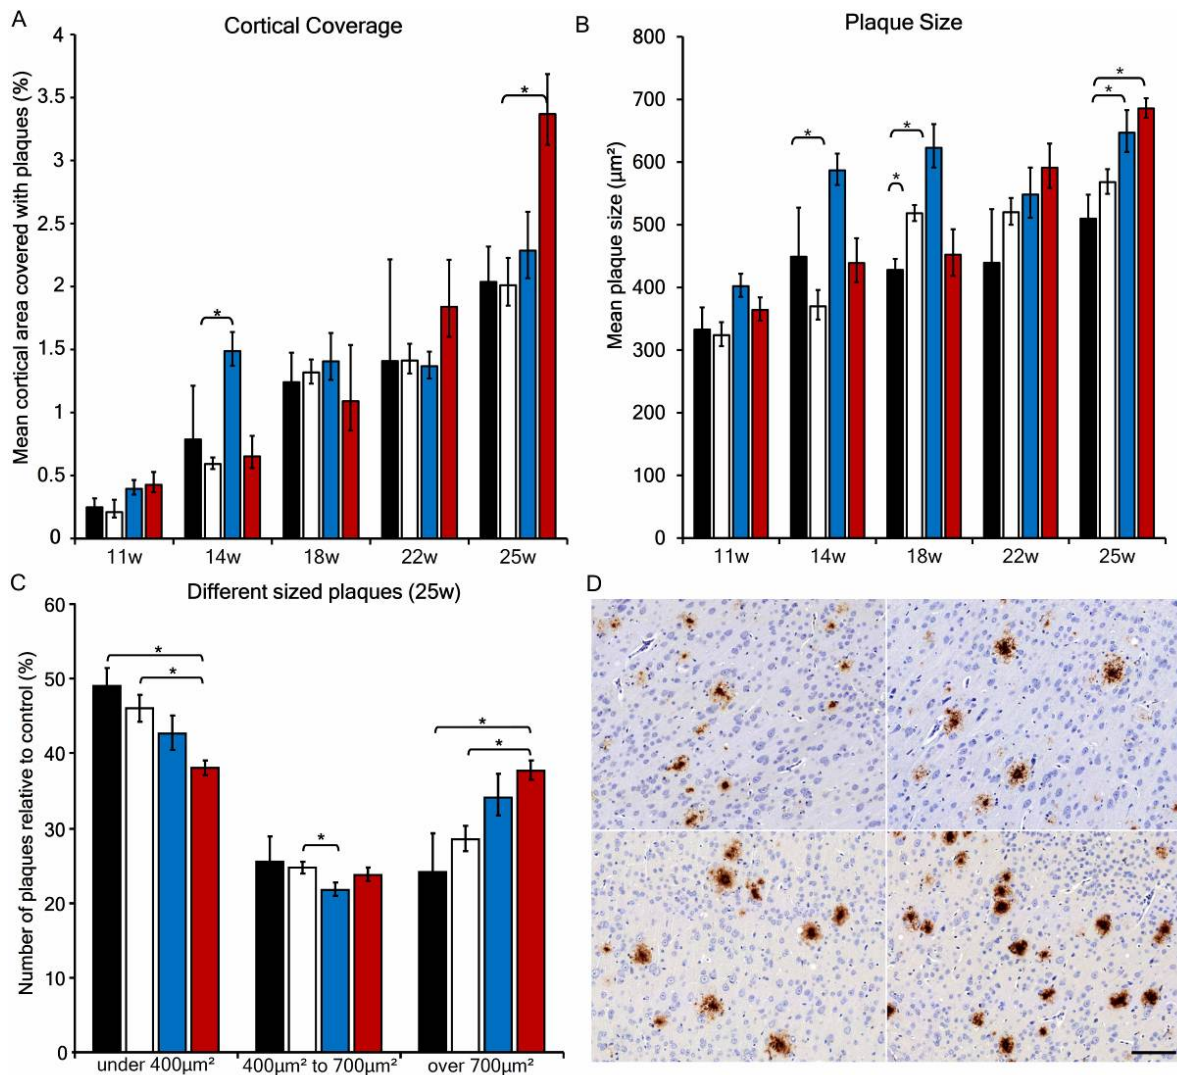

### Supplementary Figure 1. Quantification of Aβ deposition using immunohistochemistry

- (A) Cortical areal density (coverage) and size of plaques are increased in specific ABC transporter knockout mice (controls ■, APP/PS1xABCG2<sup>-/-</sup> □, APP/PS1xABCB1<sup>-/-</sup> ■, APP/PS1xABCC1<sup>-/-</sup> ■). APP/PS1xABCC1<sup>-/-</sup> mice show the greatest β-amyloid burden. (n≥5)
- (B) Overall plaque size is increased in APP/PS1xABCC1<sup>-/-</sup> and APP/PS1xABCB1<sup>-/-</sup> mice at the age of 25 weeks. (n≥5)
- (C) The overall increase in plaque size is associated with the occurrence of fewer small plaques and more large plaques (>700 μm<sup>2</sup>), whereas the numbers of medium-sized plaques remain at the same levels in 25 week-old animals. (n≥5)
- (D) Cortical plaque size and staining intensity are elevated in APP/PS1xABCC1<sup>-/-</sup> mice (top left - APP/PS1; top right - APP/PS1xABCG2<sup>-/-</sup>; bottom left - APP/PS1xABCB1<sup>-/-</sup>; bottom right - APP/PS1xABCC1<sup>-/-</sup>). Anti-Aβ (6F3D) staining. Scale bar = 100 μm, age 25 weeks.

Error bars = s.e.m., \* p<0.05

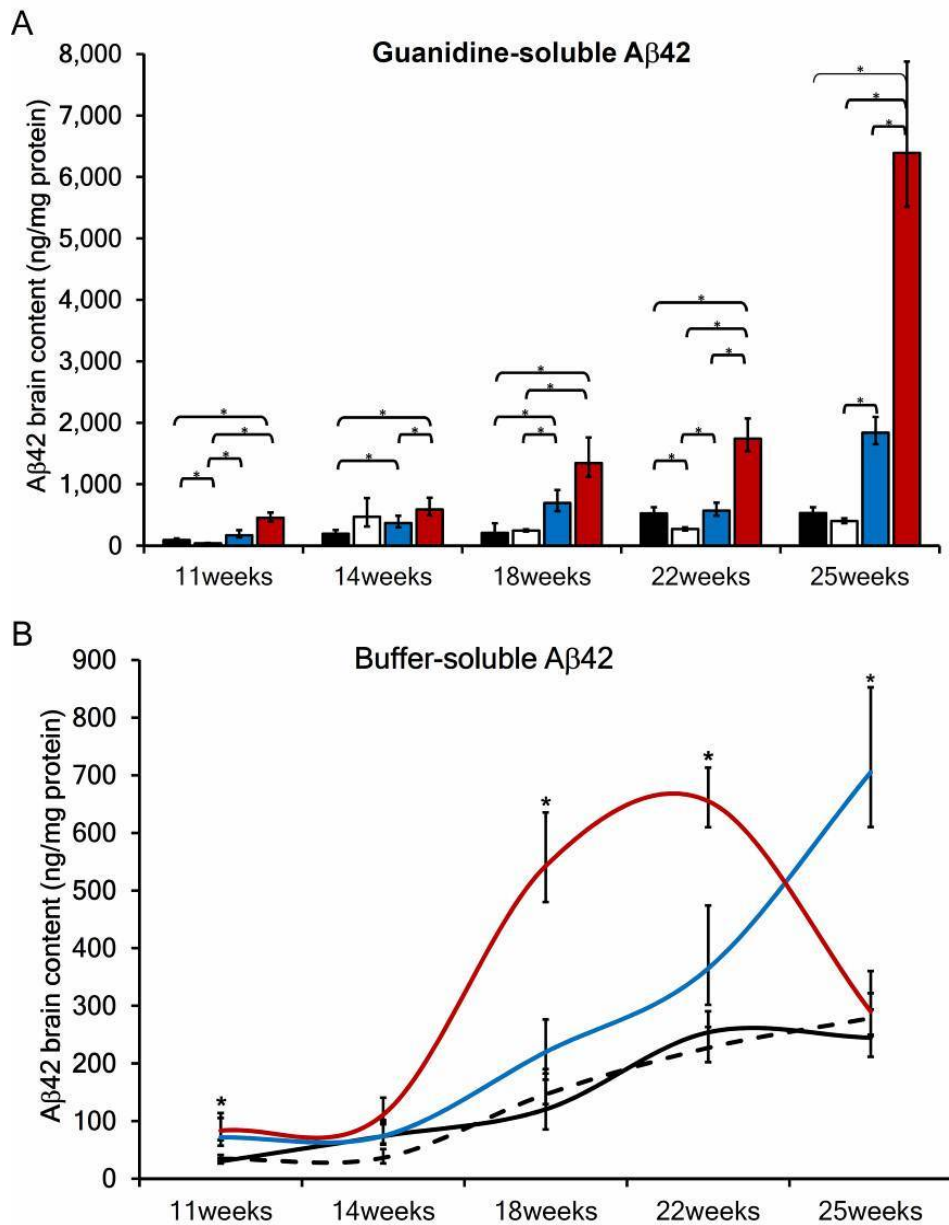

**Supplementary Figure 2. Age-related Aβ42 concentrations measured by ELISA**

(A) A strong increase in guanidine-soluble Aβ42 content was observed in APP/PS1xABCC1<sup>-/-</sup> mice ■ (up to 12-fold in APP/PS1xABCC1<sup>-/-</sup> mice and 3.5-fold in APP/PS1xABC1<sup>-/-</sup> mice ■ vs. controls ■). APP/PS1xABC1<sup>-/-</sup> and APP/PS1xABC1<sup>-/-</sup> mice showed increased Aβ42 levels even at early time points in the analyzed time series. APP/PS1xABCG2<sup>-/-</sup> mice □ showed no differences as compared to controls. (n≥4)

(B) Buffer-soluble Aβ42 increases rapidly between 14w and 18w of age in APP/PS1xABCC1<sup>-/-</sup> mice ■. A similar increase is found in APP/PS1xABC1<sup>-/-</sup> mice ■ with a delay of approximately 6 weeks. After 22 weeks, there is a sharp decline in soluble Aβ42 in APP/PS1xABCC1<sup>-/-</sup> mice, possibly owing to sequestration of the peptide in cerebral Aβ deposits. Controls ■, APP/PS1xABCG2<sup>-/-</sup> mice dotted line. (n≥4)

Error bars = s.e.m., \* p<0.05

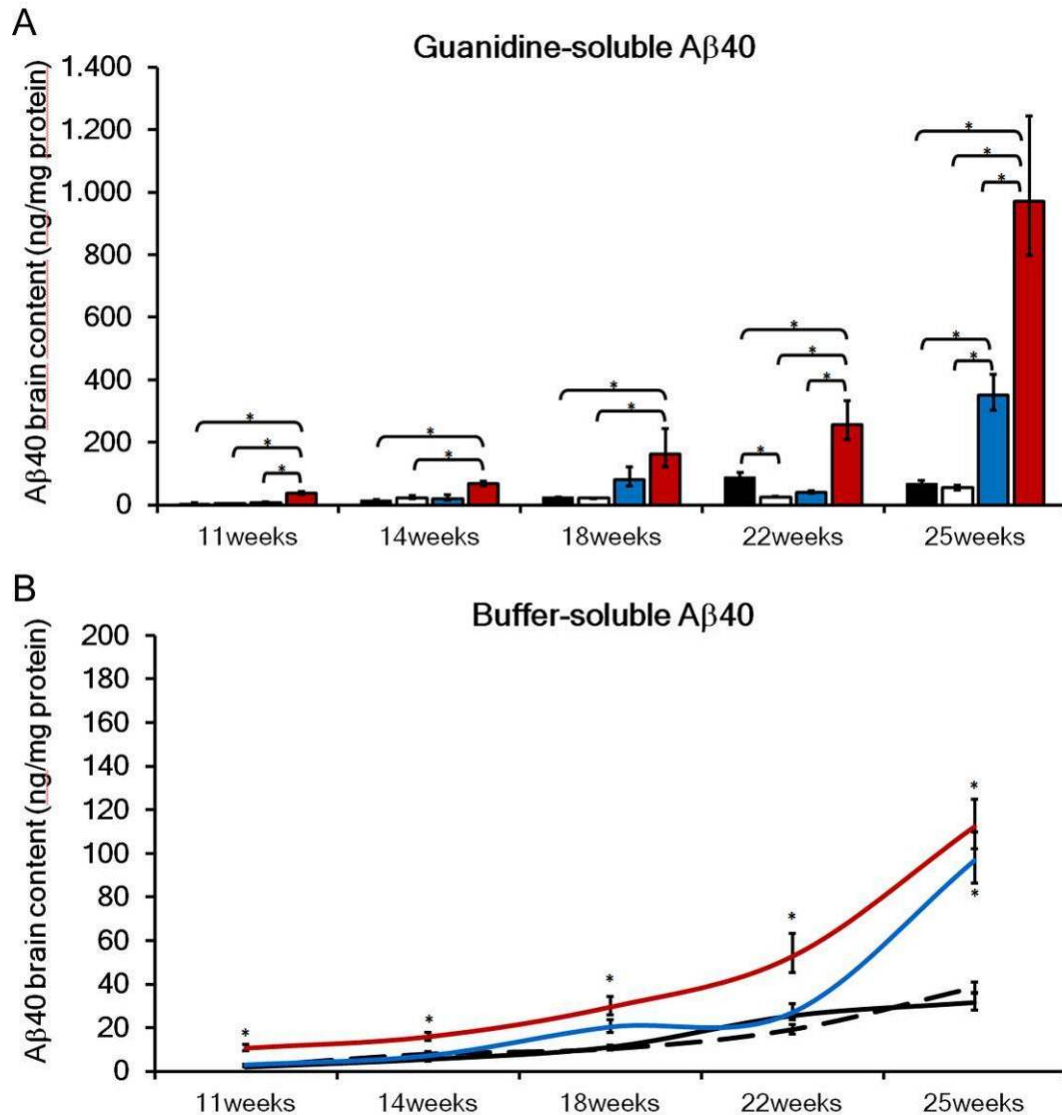

**Supplementary Figure 3. Age-related Aβ40 concentrations measured by ELISA**

(A) A strong increase in guanidine-soluble Aβ40 content was observed in APP/PS1xABCC1<sup>-/-</sup> mice ■ (up to 14-fold in APP/PS1xABCC1<sup>-/-</sup> mice and 5-fold in APP/PS1xABCB1<sup>-/-</sup> mice ■ vs. controls ■). APP/PS1xABC1<sup>-/-</sup> and APP/PS1xABCB1<sup>-/-</sup> mice showed increased Aβ40 levels even at early time points in the analyzed time series. APP/PS1xABCG2<sup>-/-</sup> mice □ showed no differences as compared to controls. Guanidine-soluble Aβ40 accumulation parallels that of Aβ42. (n≥4)

(B) Buffer-soluble Aβ40 increases rapidly between 18w and 25w of age in APP/PS1xABCC1<sup>-/-</sup> mice ■. Possibly due to its lower aggregation propensity, buffer-soluble Aβ40 levels do not decline precipitously like Aβ42 from age 22 weeks to 25weeks. Controls ■, APP/PS1xABCB1<sup>-/-</sup> ■ APP/PS1xABCG2<sup>-/-</sup> mice dotted line. (n=4)

Error bars = s.e.m., \* p<0.05

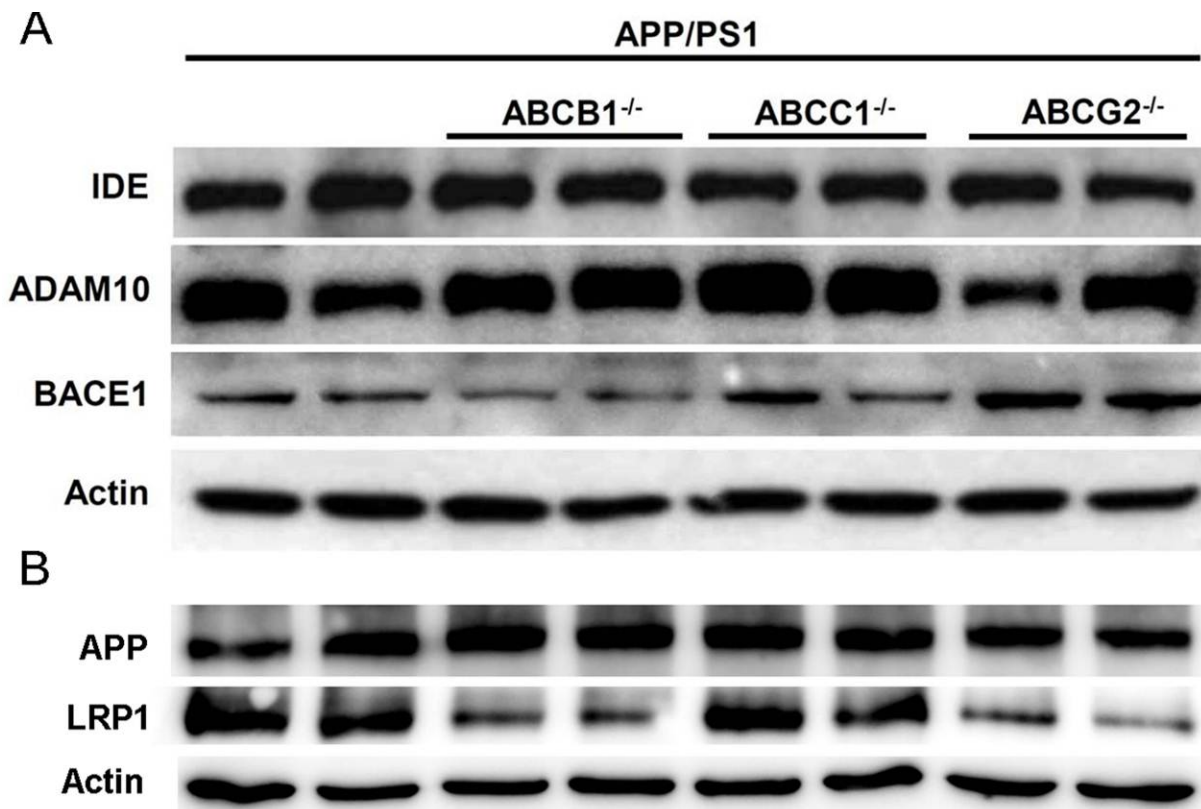

**Supplementary Figure 4. Differences in APP processing do not account for accelerated A $\beta$  accumulation in APP/PS1xABCB1<sup>-/-</sup> and APP/PS1xABCC1<sup>-/-</sup> mice**

(A) Immunoblotting revealed a compensatory increase of ADAM10 in APP/PS1xABCB1<sup>-/-</sup> and APP/PS1xABCC1<sup>-/-</sup> mice that corresponds to the higher A $\beta$  load.  $\beta$ -secretase (BACE1) expression was increased in APP/PS1xABCG2<sup>-/-</sup> mice only. Insulin-degrading enzyme (IDE) expression was not significantly altered. (B) APP transgene expression was unchanged in all strains. LRP1 abundance was significantly lower in APP/PS1xABCB1<sup>-/-</sup> and APP/PS1xABCG2<sup>-/-</sup> mice, whereas APP/PS1xABCC1<sup>-/-</sup> mice exhibited similar levels to APP/PS1 controls. (n=5, 10 $\mu$ g each, pooled)



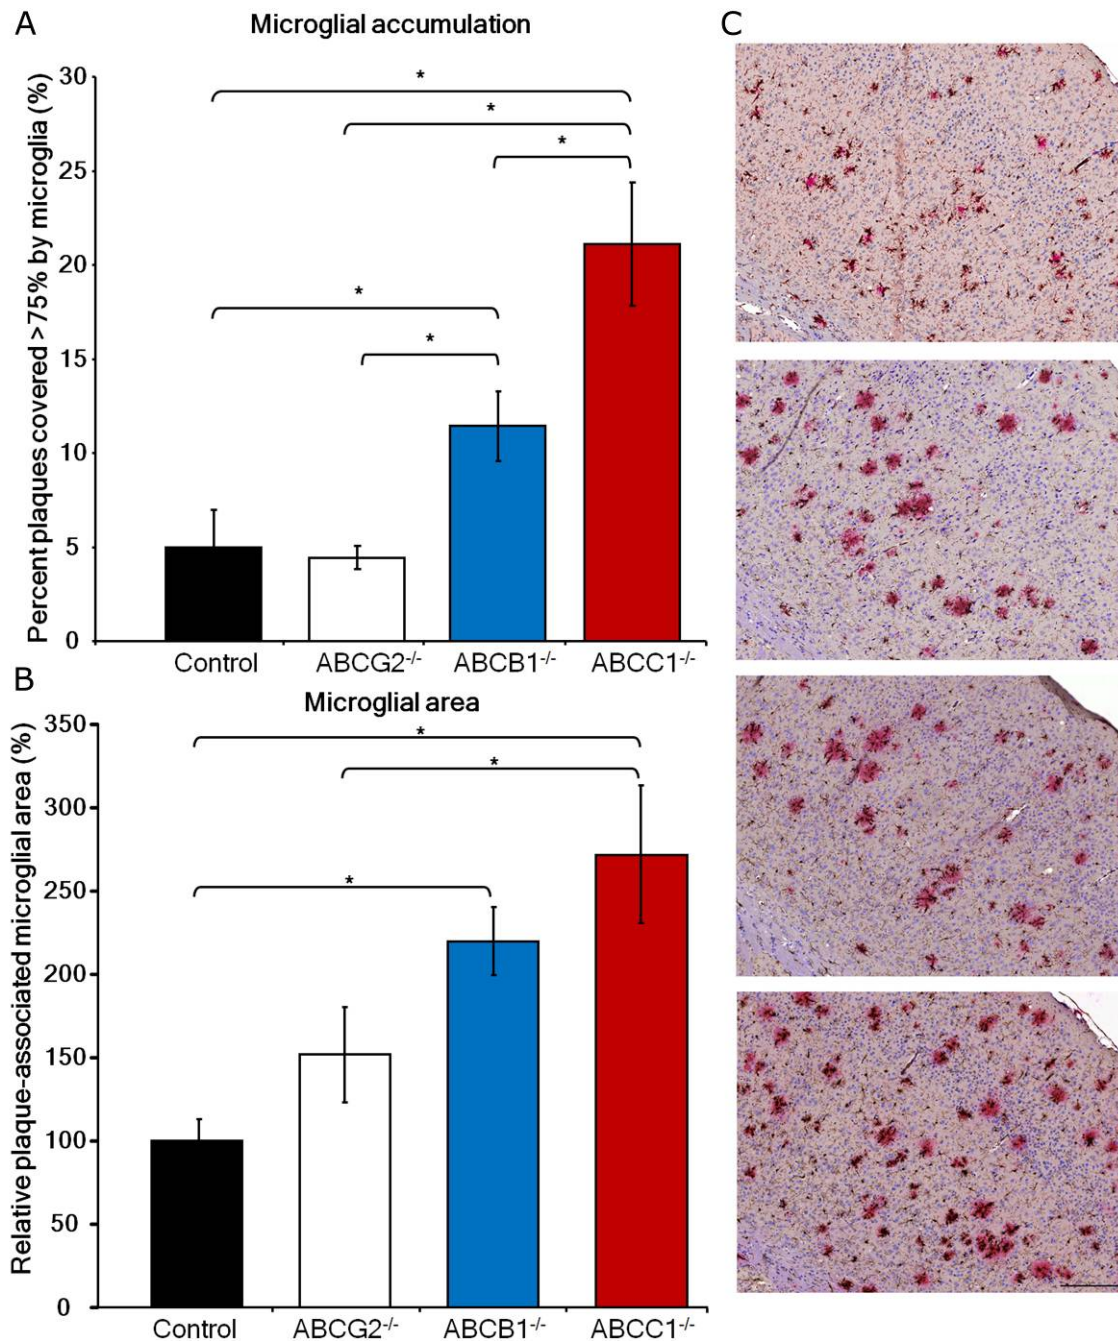

**Supplementary Figure 5. Microglial density increases with increasing Aβ content but is not associated with reduced Aβ load in APP/PS1xABCC1<sup>-/-</sup> mice**

(A) Area covered by microglia associated with Aβ deposits in the neocortex.

(B) The percentage of Aβ plaques that are densely covered ( $\geq 75\%$ ) by microglia is increased in both APP/PS1xABCC1<sup>-/-</sup> and APP/PS1xABCB1<sup>-/-</sup> mice, but not in APP/PS1xABCG2<sup>-/-</sup> mice. (n $\geq 5$ ) Error bars = s.e.m., \* p<0.05

(C) Representative images of Iba1-Aβ double IHC staining in comparable regions of the frontal neocortex. Microglia (anti-Iba1) are shown in brown and Aβ (anti-Aβ(6F3D)) in red. From top to bottom, the photos show APP/PS1, APP/PS1xABCG2<sup>-/-</sup>, APP/PS1xABCB1<sup>-/-</sup>, and APP/PS1xABCC1<sup>-/-</sup> mice. Scale bar = 100μm

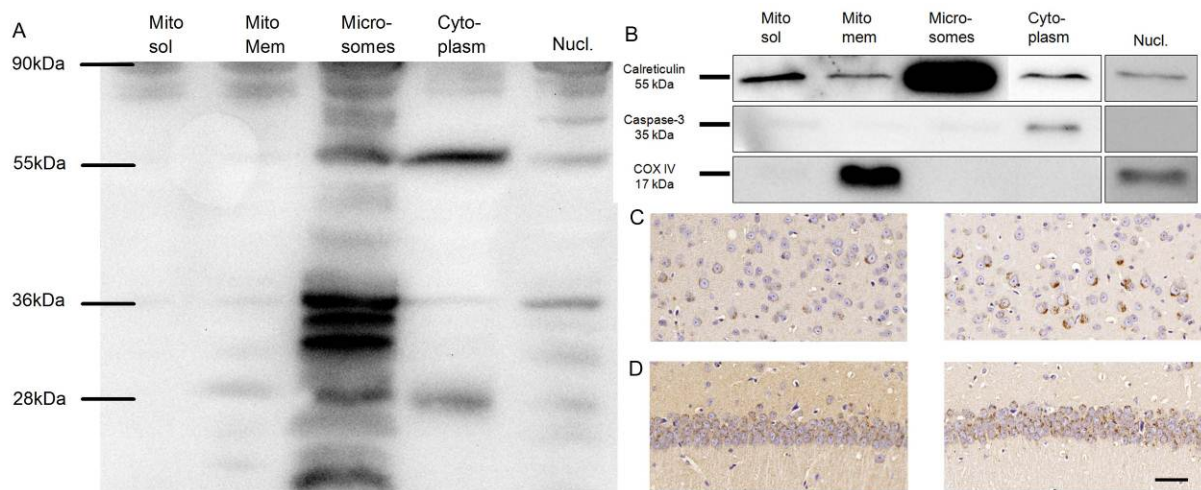

### Supplementary Figure 6. Localization of intracellular A $\beta_{dt}$

(A) Western blot of subcellular fractions of brain tissue from APP<sub>dt</sub>/ABCC1<sup>-/-</sup> mice (anti-A $\beta$ , clone 6E10) reveals a predominant microsomal localization of antigen.

(B) Marker proteins of fractions show minor microsomal contamination of the other fractions.

(C-D) Immunohistochemical staining for A $\beta$  (anti-A $\beta_{42}$ ) reveals heavy intraneuronal accumulation of A $\beta_{dt}$  at age 16 months, especially in neocortical layer 5 (C) and hippocampal CA-regions (D); the left column shows a control mouse, the right column shows an APP<sub>dt</sub>/ABCC1<sup>-/-</sup> mouse. Pyramidal neurons have been found to express ABCB1 and ABCC1, providing a potential link to the augmented intracellular accumulation of A $\beta$  (12). Scale bar = 50  $\mu$ m.

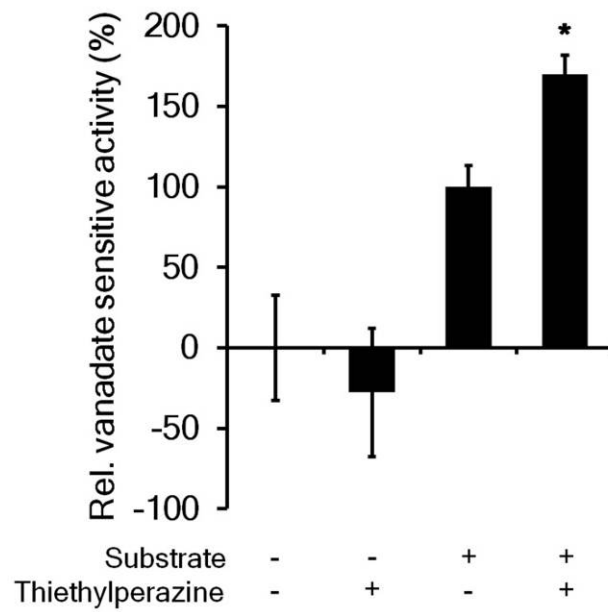

**Supplementary Figure 7. Thiethylperazine enhances ABCC1 transport activity**

ABCC1 activity assay using NEM-GS as substrate supports the data of Wesolowska et al. (13). Thiethylperazine enhanced ABCC1 activity for the assay substrate. Furthermore, the data revealed that thiethylperazine is an activator but not a substrate, since no activation is measured in the absence of NEM-GS.

Error bars, s.e.m., (n=3, \*p<0.05).

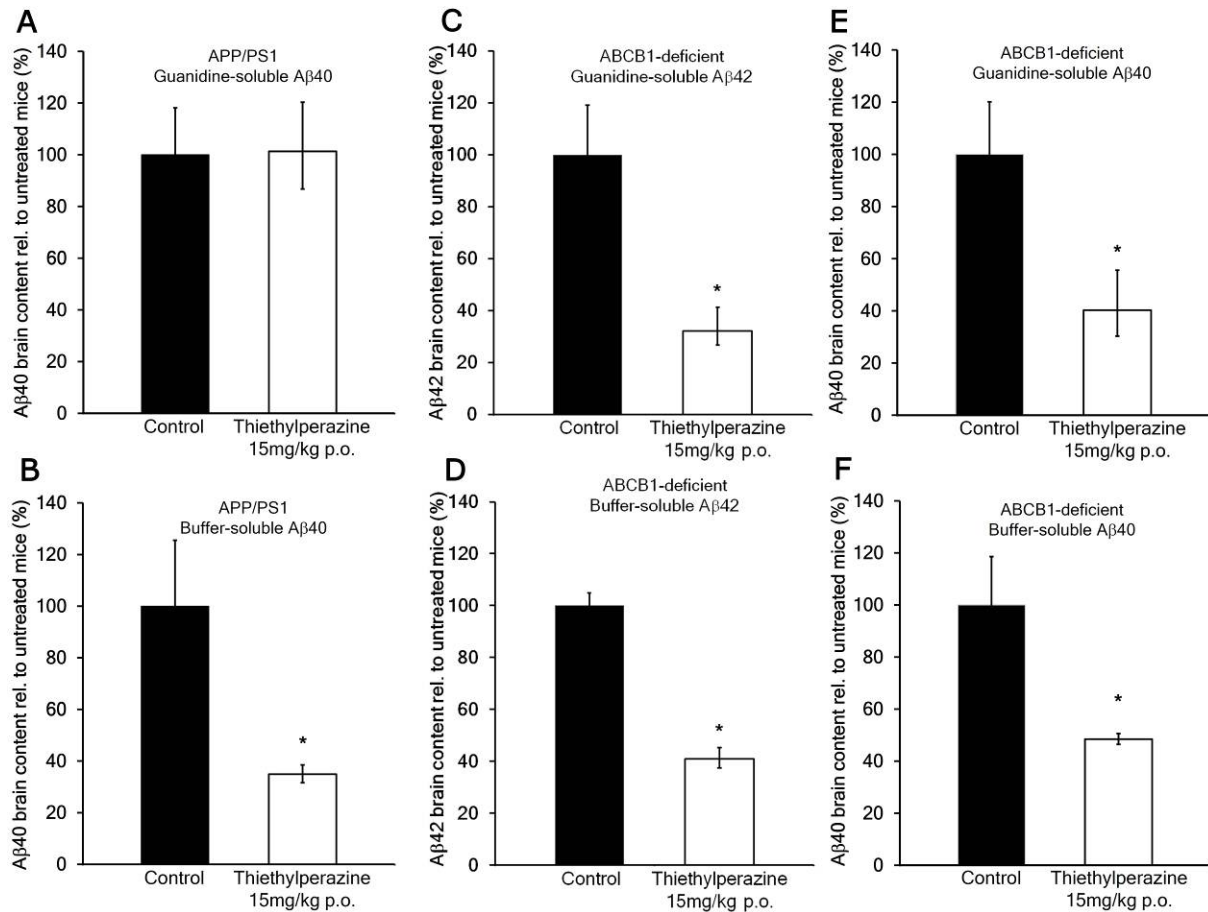

**Supplementary Figure 8. A therapeutic treatment paradigm (day 75 - day 100) with thiethylperazine reduces Aβ40 levels**

Mice treated p.o. with 15mg/kg/day thiethylperazine (ABCC1 activator and ABCB1 inhibitor (13)). (A-B) Only buffer-soluble Aβ40 is reduced in APP/PS1 mice, whereas (C-F) buffer-soluble and guanidine-soluble Aβ40 and Aβ42 are even more reduced in ABCB1-deficient mice as compared to the p.o. treatment of APP/PS1 mice (Figure 6 in the main text) supporting ABCC1 as primary target for Aβ reduction.

Error bars, s.e.m., (n≥4, \*p<0.05).



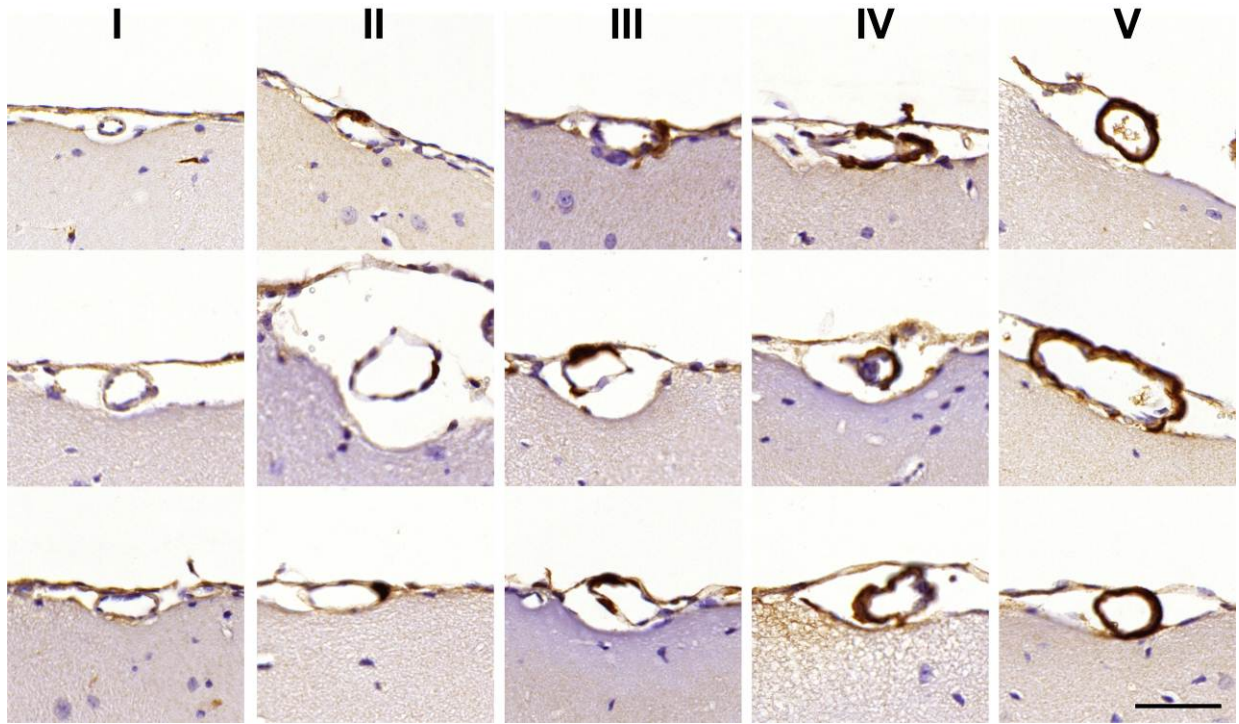

**Supplementary Figure 9. Categorization of cerebral amyloid angiopathy severity in  $APP_{dt}$  – transgenic mice**

I - no A $\beta$  positivity at the vessel wall; II  $\leq 25\%$  of the circumference labeled; III 26-50% of the circumference labeled; IV 51-75% of the circumference labeled; and V  $> 75\%$  of the circumference labeled.

## Supplementary Tables

| Parameter | Value | Explanation                                                                        |
|-----------|-------|------------------------------------------------------------------------------------|
| $n_n$     | 6     | Number of monomers in the nucleus                                                  |
| $n_s$     | 15    | Number of monomers included in the largest aggregate belonging to the soluble pool |
| $n_i$     | 55    | Number of monomers in the largest aggregate belonging to the insoluble pool        |

**Supplementary Table 1.** Integer parameters used in the model

| Parameter    | Value                                                     | Explanation                                      |
|--------------|-----------------------------------------------------------|--------------------------------------------------|
| $p'$         | $91.239 t^{-1} \cdot \left[ \frac{X}{mg} \right]$         | Production rate of monomeric A $\beta$           |
| $k_n'$       | $0.345 t^{-1} \cdot \left[ \frac{X}{mg} \right]^{-n_n+1}$ | Nucleation constant                              |
| $k_{sol}'$   | $0.342 t^{-1} \cdot \left[ \frac{X}{mg} \right]^{-1}$     | Aggregation constant for soluble aggregates      |
| $k_{insol}'$ | $0.358 t^{-1} \cdot \left[ \frac{X}{mg} \right]^{-1}$     | Aggregation constant for insoluble aggregates    |
| $s_T'$       | $17.744 \left[ \frac{X}{mg} \right]$                      | Shift parameter for transport mechanism          |
| $e_T$        | 7.811                                                     | Exponent for transport mechanism (dimensionless) |
| $c_T$        | $82.419 t^{-1}$                                           | Capacity of the transport mechanism              |

**Supplementary Table 2.** Real-valued parameters for the mathematical model with variables in units  $ng/mg$ . The time scale for the model simulation was 50 to 200 days.  $X = 6.642 \cdot 10^{-12}$  ng (4 kDa) is the mass of an A $\beta$  monomer.

| Species   | Initial concentration | Explanation                   |
|-----------|-----------------------|-------------------------------|
| $M'(t_0)$ | $1.0439 \frac{X}{mg}$ | Initial monomer concentration |

**Supplementary Table 3.** Initial concentration of monomers ( $t_0 = 50$  days) used for the simulation of the mathematical model with variables in units  $ng/mg$ . The initial concentration for all other species was set at zero.  $X = 6.642 \cdot 10^{-12}$  ng is the mass of an A $\beta$  monomer.

|                            | 11w     | 14w     | 18w     | 22w      | 25w      |
|----------------------------|---------|---------|---------|----------|----------|
| <b>ABCC1<sup>-/-</sup></b> |         |         |         |          |          |
| <b>P-value*</b>            | 0.714   | 0.304   | 0.252   | 0.194    | 0.061    |
| <b>P-value**</b>           | 0.324   | 0.023   | 0.916   | 0.749    | 0.159    |
| <b>n</b>                   | 7       | 9       | 8       | 10       | 9        |
| <b>skewness</b>            | -0.48   | -0.24   | 0.61    | 0.79     | 0.27     |
| <b>ABCC1<sup>-/-</sup></b> |         |         |         |          |          |
| <b>P-value*</b>            | 0.804   | 0.022   | 0.756   | 0.971    | 0.004    |
| <b>P-value**</b>           | 0.834   | 0.348   | 0.297   | 0.483    | 0.015    |
| <b>n</b>                   | 6       | 8       | 8       | 10       | 9        |
| <b>skewness</b>            | 0.16    | 1.20    | 0.13    | -0.18    | 1.68     |
| <b>control</b>             |         |         |         |          |          |
| <b>P-value*</b>            | 0.162   | 0.612   | 0.127   | 0.082    | 0.546    |
| <b>P-value**</b>           | 0.826   | 0.254   | 0.036   | 0.355    | 0.834    |
| <b>n</b>                   | 9       | 8       | 4       | 7        | 6        |
| <b>skewness</b>            | 1.35    | -0.60   | -0.70   | 1.11     | 0.14     |
| <b>control</b>             |         |         |         |          |          |
| <b>P-value*</b>            | 0.487   | 0.227   | 0.794   | 0.305    | 0.219    |
| <b>P-value**</b>           | 0.978   | 0.544   | 0.901   | 0.188    | 0.239    |
| <b>n</b>                   | 9       | 9       | 4       | 7        | 6        |
| <b>skewness</b>            | 0.68316 | 0.21302 | 0.4529  | -0.51367 | 0.48191  |
| <b>ABCG2<sup>-/-</sup></b> |         |         |         |          |          |
| <b>P-value*</b>            | 0.545   | ***     | 0.830   | 0.615    | 0.977    |
| <b>P-value**</b>           | 0.982   |         | 0.840   | 0.607    | 0.865    |
| <b>n</b>                   | 11      |         | 9       | 9        | 6        |
| <b>skewness</b>            | 0.6402  |         | 0.17733 | 0.079067 | 0.20947  |
| <b>ABCG2<sup>-/-</sup></b> |         |         |         |          |          |
| <b>P-value*</b>            | 0.143   | ***     | 0.448   | 0.234    | 0.082    |
| <b>P-value**</b>           | 0.355   |         | 0.845   | 0.032    | 0.019    |
| <b>n</b>                   | 11      |         | 9       | 9        | 6        |
| <b>skewness</b>            | 1.00    |         | 0.75292 | -0.35254 | -0.16778 |
| <b>ABCB1<sup>-/-</sup></b> |         |         |         |          |          |
| <b>P-value*</b>            | 0.322   | 0.500   | ***     | 0.056    | 0.209    |
| <b>P-value**</b>           | 0.483   | 0.862   |         | 0.436    | 0.560    |
| <b>n</b>                   | 7       | 5       |         | 7        | 9        |
| <b>skewness</b>            | 0.27659 | 0.61884 |         | 0.75338  | 0.80     |
| <b>ABCB1<sup>-/-</sup></b> |         |         |         |          |          |
| <b>P-value*</b>            | 0.023   | 0.349   | ***     | 0.007    | 0.428    |
| <b>P-value**</b>           | 0.457   | 0.885   |         | 0.054    | 0.292    |
| <b>n</b>                   | 8       | 5       |         | 7        | 8        |
| <b>skewness</b>            | 0.52834 | 0.69379 |         | 1.4496   | -0.24686 |

\* for assumption of normally distributed data

\*\* assumption of log normally distributed data

\*\*\* data for grey fields are omitted for statistics due to small sample size (n<4)

**Supplementary Table 4.** Statistics of ELISA samples

| Gene assignment                                                           | Gene Symbol  | p-value (<10 <sup>-4</sup> significant) | Fold-Change    | SS (Attribute) | SS (Error) |
|---------------------------------------------------------------------------|--------------|-----------------------------------------|----------------|----------------|------------|
| NM_007425 // Ager // advanced glycosylation end product-specific receptor | Ager/RAGE    | 0.6772                                  | <b>-1.0126</b> | 0.1454         | 0.0126     |
| NM_008512 // Lrp1 // low density lipoprotein receptor-related protein 1   | Lrp1         | 0.4267                                  | <b>-1.0509</b> | 0.0693         | 0.0514     |
| NM_011792 // Bace1 // beta-site APP cleaving enzyme 1                     | Bace1        | 0.9784                                  | <b>-1.0014</b> | 0.0003         | 0.0372     |
| NM_019517 // Bace2 // beta-site APP-cleaving enzyme 2                     | Bace2        | 0.1807                                  | <b>1.1336</b>  | 0.1369         | 0.1015     |
| NM_019517 // Bace2 // beta-site APP-cleaving enzyme 2                     | Bace2        | 0.5732                                  | <b>-1.0508</b> | 0.0287         | 0.1057     |
| NM_146104 // Aph1a // anterior pharynx defective 1a homolog (C. elegans)  | Aph1a        | 0.2666                                  | <b>1.0290</b>  | 0.0037         | 0.0082     |
| NM_146104 // Aph1a // anterior pharynx defective 1a homolog (C. elegans)  | Aph1a        | 0.6112                                  | <b>1.0152</b>  | 0.0055         | 0.0121     |
| NM_177583 // Aph1b // anterior pharynx defective 1b homolog (C. elegans)  | Aph1b        | 0.0189                                  | <b>-1.1419</b> | 0.1473         | 0.0235     |
| NM_026674 // Aph1c // anterior pharynx defective 1c homolog (C. elegans)  | Aph1c        | 0.2457                                  | <b>-1.0634</b> | 0.0695         | 0.0341     |
| NM_008943 // Psen1 // presenilin 1                                        | Psen1        | 0.0936                                  | <b>1.0529</b>  | 0.0095         | 0.0097     |
| NM_011183 // Psen2 // presenilin 2                                        | Psen2        | 0.4747                                  | <b>1.0279</b>  | 0.0042         | 0.0198     |
| NM_025498 // Psenen // presenilin enhancer 2 homolog (C. elegans)         | Psenen/ Pen2 | 0.6368                                  | <b>1.0088</b>  | 0.0002         | 0.0048     |
| NM_021607 // Ncstn // nicastrin                                           | Ncstn        | 0.0110                                  | <b>-1.1471</b> | 0.1094         | 0.0190     |
| NM_007399 // Adam10 // disintegrin and metallopeptidase domain 10         | Adam10       | 0.3788                                  | <b>-1.0317</b> | 0.0065         | 0.0163     |
| NM_031156 // Ide // insulin degrading enzyme                              | Ide          | 0.0503                                  | <b>1.0634</b>  | 0.0122         | 0.0090     |
| NM_199307 // Ece1 // endothelin converting enzyme 1                       | Ece1         | 0.0513                                  | <b>-1.1940</b> | 0.1199         | 0.0756     |
| NM_139293 // Ece2 // endothelin converting enzyme 2                       | Ece2         | 0.0674                                  | <b>1.1258</b>  | 0.0559         | 0.0405     |
| NM_008604 // Mme // membrane metallo endopeptidase / neprilysin           | Mme/ NEP     | 0.7896                                  | <b>1.0076</b>  | 0.0037         | 0.0114     |

**Supplementary Table 5.** mRNA expression changes of A $\beta$  transporting & degrading enzymes and  $\gamma$ -secretase complex components in APP/PS1xABCC1<sup>-/-</sup> versus APP/PS1 mice (controls) reveals no differences.

## Supplementary References

1. Craft, D.L., Wein, L.M., and Selkoe, D.J. 2002. A mathematical model of the impact of novel treatments on the A beta burden in the Alzheimer's brain, CSF and plasma. *Bull Math Biol* 64:1011-1031.
2. Kuhnke, D., Jedlitschky, G., Grube, M., Krohn, M., Jucker, M., Mosyagin, I., Cascorbi, I., Walker, L.C., Kroemer, H.K., Warzok, R.W., et al. 2007. MDR1-P-Glycoprotein (ABCB1) Mediates Transport of Alzheimer's amyloid-beta peptides--implications for the mechanisms of Abeta clearance at the blood-brain barrier. *Brain Pathol* 17:347-353.
3. Vogelgesang, S., Kunert-Keil, C., Cascorbi, I., Mosyagin, I., Schroder, E., Runge, U., Jedlitschky, G., Kroemer, H.K., Oertel, J., Gaab, M.R., et al. 2004. Expression of multidrug transporters in dysembryoplastic neuroepithelial tumors causing intractable epilepsy. *Clin Neuropathol* 23:223-231.
4. Lam, F.C., Liu, R., Lu, P., Shapiro, A.B., Renoir, J.M., Sharom, F.J., and Reiner, P.B. 2001. beta-Amyloid efflux mediated by p-glycoprotein. *J Neurochem* 76:1121-1128.
5. Vogelgesang, S., Cascorbi, I., Schroeder, E., Pahnke, J., Kroemer, H.K., Siegmund, W., Kunert-Keil, C., Walker, L.C., and Warzok, R.W. 2002. Deposition of Alzheimer's beta-amyloid is inversely correlated with P-glycoprotein expression in the brains of elderly non-demented humans. *Pharmacogenetics* 12:535-541.
6. Ahmed, M., Davis, J., Aucoin, D., Sato, T., Ahuja, S., Aimoto, S., Elliott, J.I., Van Nostrand, W.E., and Smith, S.O. 2010. Structural conversion of neurotoxic amyloid-beta(1-42) oligomers to fibrils. *Nat Struct Mol Biol* 17:561-567.
7. Bernstein, S.L., Dupuis, N.F., Lazo, N.D., Wyttenbach, T., Condron, M.M., Bitan, G., Teplow, D.B., Shea, J.-E., Ruotolo, B.T., Robinson, C.V., et al. 2009. Amyloid-beta protein oligomerization and the importance of tetramers and dodecamers in the aetiology of Alzheimer's disease. *Nat Chemistry* 1:326-331.
8. Bernacki, J.P., and Murphy, R.M. 2009. Model discrimination and mechanistic interpretation of kinetic data in protein aggregation studies. *Biophys J* 96:2871-2887.
9. Walsh, D.M., and Selkoe, D.J. 2007. A beta oligomers - a decade of discovery. *J Neurochem* 101:1172-1184.
10. Vaz, A.I.F., and Vicente, L.N. 2007. A particle swarm pattern search method for bound constrained global optimization. *Journal of Global Optimization* 39:197-219.
11. Xue, W.F., Hellewell, A.L., Gosal, W.S., Homans, S.W., Hewitt, E.W., and Radford, S.E. 2009. Fibril fragmentation enhances amyloid cytotoxicity. *J Biol Chem* 284:34272-34282.
12. Daood, M., Tsai, C., Ahdab-Barmada, M., and Watchko, J.F. 2008. ABC transporter (P-gp/ABCB1, MRP1/ABCC1, BCRP/ABCG2) expression in the developing human CNS. *Neuropediatrics* 39:211-218.
13. Wesolowska, O., Molnar, J., Ocsovszki, I., and Michalak, K. 2009. Differential effect of phenothiazines on MRP1 and P-glycoprotein activity. *In Vivo* 23:943-947.
